# Supplementary material for: Quantification of antibiotic resistance genes and mobile genetic in dairy manure
Source: PeerJ journal article supplement (doi:10.7717/peerj.12408), 2021-12-23
Supplement: Figure_S1-S6.pdf [file Figure_S1-S6.pdf]

## **SUPPLEMENTAL MATERIAL**

### **Quantification of antibiotic resistance genes and mobile genetic in dairy manure**

*Yi Wang<sup>1,2</sup>, Pramod Pandey<sup>1\*</sup>, Colleen Chiu<sup>1</sup>, Richard Jeannotte<sup>3</sup>, Sundaram Kuppu<sup>1</sup>, Ruihong Zhang<sup>2</sup>,  
Richard Pereira<sup>1</sup>, Bart Weimer<sup>1</sup>, Sharif Aly<sup>1</sup>*

*<sup>1</sup>Department of Population Health and Reproduction, School of Veterinary Medicine, University of  
California-Davis, California 95616, USA*

*<sup>2</sup>Department of Biological and Agricultural Engineering, University of California-Davis, California  
95616, USA*

*<sup>3</sup>Department of Plant Science, University of California Davis*

*\* Corresponding authors:*

*Pramod Pandey Email: [pkpandey@ucdavis.edu](mailto:pkpandey@ucdavis.edu)*

*sulII* gene:

CGGGAATGCCATCTGCCTTGAGCGCGTCCAGCACCGGCGCGATACGCGCGATTTCTG  
TGTCGGACGAAACAGGCGCGGCGTCGGGATTGCTGGATGCCGGACCGAGGTTCGATC  
ACATCTGCCCCCTCGGCCATCAGCTTACGCGCCTGCGCAATGGCTGCGTCTGGCGCC  
AGATACCGGCCTCCACCGGA

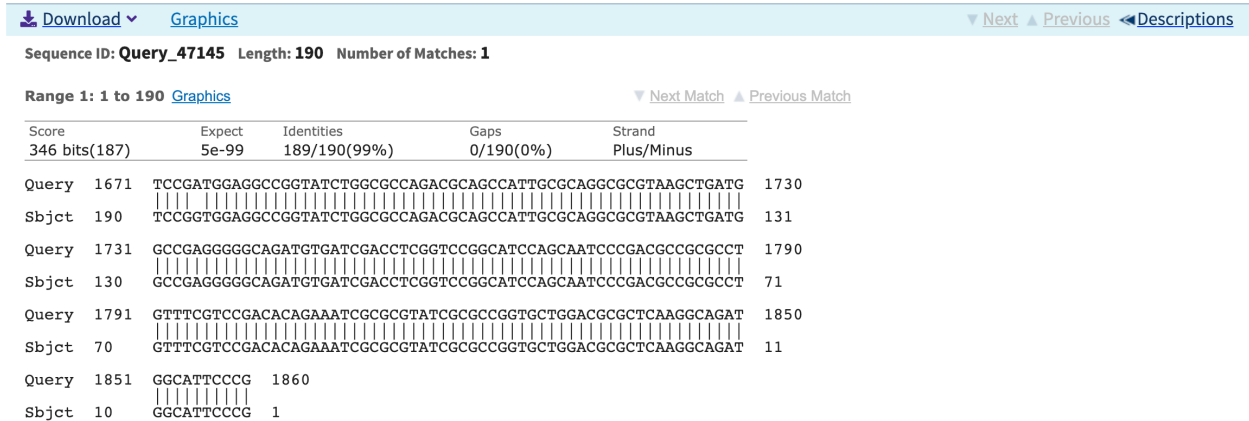

Fig. S1. BLAST with *sulII* gene sequence (GenBank: EU360945.1)

*tetW* gene:

GAGAGCCTGCTATATGCCAGCGGAGCCATTTTCAGAACCGGGGAGCGTCGAAAAAGG  
GACAACGAGGACGGACACCATGTTTTTGGAGCGGCAGCGTGGGATACCATTCAAGC  
GGCAGTCACTTCCCTTCCAGTGGCACAGATGTAAAGTTAACATTGTGGATACGCC

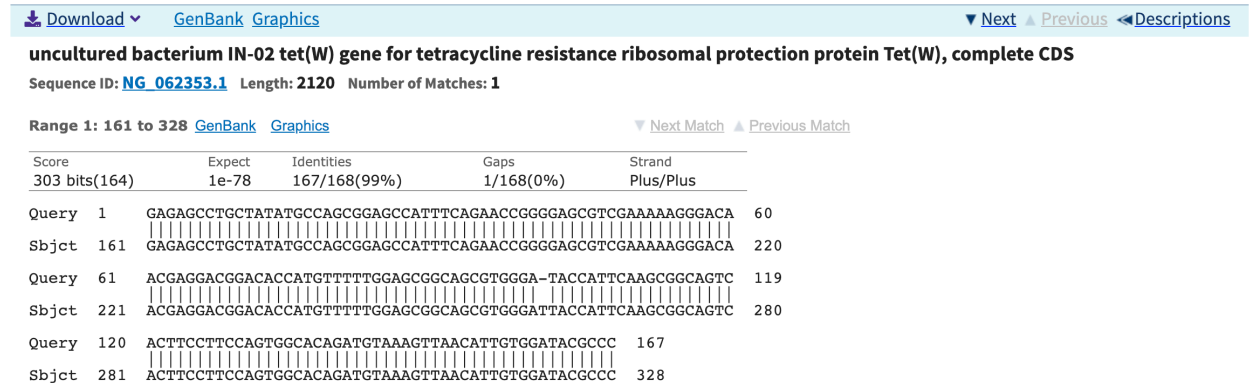

Fig. S2. BLAST with *tetW* gene sequence (NCBI Reference Sequence: NG\_062353.1)

*intI1* gene:

ACATGCGTGTAATCATCGTCGTGGAAACGTCGGAATGGCCGAGTAGGTCCTGCAC  
GGTTCGAATGTTCGTAACCGCTGCGGAGCAAGGCCGTCGCGAACGAGTGGCGGAGGG  
TGTGCGGTGTGGCGGGCTTCGTGATGCCTGCTTGTCTACGGCACGTTTGAAGGCGC  
GCTGAAAGGTCTGGTCATACATGTGATGGCGACGCACGACACCGCTCCGTGGATCG  
GTCGAATGCGTGTGCTGCGCGAAAACCCAGAACCACGGCCAAGAATGCCCCGGCGCG  
CGGATACTTCCGCTCAAGGGCGTCGGGAAGCGCAACGCCGCTGCGGCCCTCGGCCT  
GGTCCTTCAGCCACCATGCCCGTGCACGCGACAGCTGCTCGCGCAGGCTGGGTGCCA  
AGCTCTCGGGTAACATCAAGGCCCGATCCTTGGAGCCCTTGCCCTCCCGCACGATGA  
TCGTGCCGTGATCGAAATCCAG

[Download](#) [GenBank Graphics](#) [Next](#) [Previous](#) [Descriptions](#)

**Pseudomonas sp. 9SN1 Class 1 integron integrase (intI1) gene, partial cds**

Sequence ID: [JN870910.1](#) Length: 944 Number of Matches: 1

Range 1: 1 to 473 [GenBank](#) [Graphics](#)

[Next Match](#) [Previous Match](#)

| Score         | Expect                                                       | Identities   | Gaps      | Strand    |
|---------------|--------------------------------------------------------------|--------------|-----------|-----------|
| 841 bits(455) | 0.0                                                          | 467/473(99%) | 0/473(0%) | Plus/Plus |
| Query 1       | ACATGCGTGTAATCATCGTCGTGGAAACGTCGGAATGGCCGAGTAGGTCCTGCACGGTT  | 60           |           |           |
| Sbjct 1       | ACATGCGTGTAATCATCGTCGTAGAGACGTCGGAATGGCCGAGCAGATCCTGCACGGTT  | 60           |           |           |
| Query 61      | CGAATGTCGTAACCGCTGCGGAGCAAGGCCGTCGCGAACGAGTGGCGGAGGGTGTGCGGT | 120          |           |           |
| Sbjct 61      | CGAATGTCGTAACCGCTGCGGAGCAAGGCCGTCGCGAACGAGTGGCGGAGGGTGTGCGGT | 120          |           |           |
| Query 121     | GTGGCGGGCTTCGTGATGCCTGCTTGTCTACGGCACGTTTGAAGCGCGCTGAAAGGTC   | 180          |           |           |
| Sbjct 121     | GTGGCGGGCTTCGTGATGCCTGCTTGTCTACGGCACGTTTGAAGCGCGCTGAAAGGTC   | 180          |           |           |
| Query 181     | TGGTCATACATGTGATGGCGACGCACGACCCGTCGGTGGATCGGTGCAATGCGTGTGC   | 240          |           |           |
| Sbjct 181     | TGGTCATACATGTGATGGCGACGCACGACCCGTCGGTGGATCGGTGCAATGCGTGTGC   | 240          |           |           |
| Query 241     | TGCGCGAAAACCCAGAACCACGGCCAAGAATGCCCGGCGCGGATACTTCCGCTCAAGG   | 300          |           |           |
| Sbjct 241     | TGCGCAAAAACCCAGAACCACGGCCAAGAATGCCCGGCGCGGATACTTCCGCTCAAGG   | 300          |           |           |
| Query 301     | GCGTCGGGAAGCGCAACGCCGCTGCGGCCCTCGGCCTGGTCTCAGCCACCATGCCCGT   | 360          |           |           |
| Sbjct 301     | GCGTCGGGAAGCGCAACGCCGCTGCGGCCCTCGGCCTGGTCTCAGCCACCATGCCCGT   | 360          |           |           |
| Query 361     | GCACGCGACAGCTGCTCGCGCAGGCTGGGTGCCAAGCTCTCGGGTAACATCAAGGCCGA  | 420          |           |           |
| Sbjct 361     | GCACGCGACAGCTGCTCGCGCAGGCTGGGTGCCAAGCTCTCGGGTAACATCAAGGCCGA  | 420          |           |           |
| Query 421     | TCCTTGGAGCCCTTGCCCTCCCGCACGATGATCGTCCGTGATCGAAATCCAG         | 473          |           |           |
| Sbjct 421     | TCCTTGGAGCCCTTGCCCTCCCGCACGATGATCGTCCGTGATCGAAATCCAG         | 473          |           |           |

Fig. S3. BLAST with *intI1* gene sequence (GenBank: JN870910.1)

*ermF* gene

CGACACAGCTTTGGTTGAACATTTACGAAAATTATTTTCTGATGCCCGAAATGTTCA  
AGTTGTCGGTGTGATTTTAGGAATTTAGCAGTTCGAAATTTCCTTTCAAAGTGGTG  
TCAAATATTCCTTATGGCATTACTCCGATATTTTCAAATCCTGATGTTTGAGAGTC  
TTGGAAATTTTCGGGGAGGTTCCATTGTCCTTCAGTTAGAACCTACACAAAAGTTAT  
TTTCGAGGAAGCTTTACAATCCATATACCGTTTTCTATCATACTTTTTTTGATTTGAA  
ACTTGTCTATGAGGTAGGTCC

[Download](#) [GenBank](#) [Graphics](#) [Next](#) [Previous](#) [Descriptions](#)

**Riemerella anatipestifer strain YXb15 macrolide-lincosamide-streptogramin-resistance protein (ermF) gene, complete cds**  
Sequence ID: [KP265720.1](#) Length: 1700 Number of Matches: 1

Range 1: 865 to 1173 [GenBank](#) [Graphics](#) [Next Match](#) [Previous Match](#)

| Score         | Expect                                                       | Identities   | Gaps      | Strand    |
|---------------|--------------------------------------------------------------|--------------|-----------|-----------|
| 555 bits(300) | 6e-154                                                       | 306/309(99%) | 0/309(0%) | Plus/Plus |
| Query 1       | CGACACAGCTTTGGTTGAACATTTACGAAAATTATTTTCTGATGCCCGAAATGTTCAAGT | 60           |           |           |
| Sbjct 865     | CGACACAGCTTTGGTTGAACATTTACGAAAATTATTTTCTGATGCCCGAAATGTTCAAGT | 924          |           |           |
| Query 61      | TGTCGGTTGTGATTTTAGGAATTTAGCAGTTCGAAATTTCCTTTCAAAGTGGTGTCAAA  | 120          |           |           |
| Sbjct 925     | TGTCGGTTGTGATTTTAGGAATTTGCAGTTCGAAATTTCCTTTCAAAGTGGTGTCAAA   | 984          |           |           |
| Query 121     | TATTCCTTATGGCATTACTTCCGATATTTCAAATCCTGATGTTGAGAGTCTTGAAA     | 180          |           |           |
| Sbjct 985     | TATTCCTTATGGCATTACTTCCGATATTTCAAATCCTGATGTTGAGAGTCTTGAAA     | 1044         |           |           |
| Query 181     | TTTTCGGGGAGGTTCCATTGTCCTTCAGTTAGAACCTACACAAAAGTTATTTTCGAGGAA | 240          |           |           |
| Sbjct 1045    | TTTTCGGGGAGGTTCCATTGTCCTTCAGTTAGAACCTACACAAAAGTTATTTTCGAGGAA | 1104         |           |           |
| Query 241     | GCTTTACAATCCATATACCGTTTTCTATCATACTTTTTGATTTGAAACTTGTCTATGA   | 300          |           |           |
| Sbjct 1105    | GCTTTACAATCCATATACCGTTTTCTATCATACTTTTTGATTTGAAACTTGTCTATGA   | 1164         |           |           |
| Query 301     | GGTAGGTCC 309                                                |              |           |           |
| Sbjct 1165    | GGTAGGTCC 1173                                               |              |           |           |

Fig.S4. BLAST with *ermF* gene sequence (GenBank: KP265720.1)

*tnpA* gene

CCGATCACGGAAAGCTCAAGATACTGATCAGGCCGGTGCAGTTTCAAATCGATC  
CCCACGGCCTATGCCACGATCAAGGGATTCTGAAGTCATGCGAGCC

[Download](#) [Graphics](#) [Next](#) [Previous](#) [Descriptions](#)

Sequence ID: **Query\_21739** Length: **101** Number of Matches: **1**

Range 1: 1 to 101 [Graphics](#) [Next Match](#) [Previous Match](#)

| Score        | Expect | Identities                                                  | Gaps      | Strand    |
|--------------|--------|-------------------------------------------------------------|-----------|-----------|
| 176 bits(95) | 5e-49  | 99/101(98%)                                                 | 0/101(0%) | Plus/Plus |
| Query 37136  |        | CCGATCACGGAAAGCTCAAGATACTGATCAAGGCCGGTGCAGTTTCAAATCGATCCCCA |           | 37195     |
| Sbjct 1      |        | CCGATCACGGAAAGCTCAAGATACTGATCAAGGCCGGTGCAGTTTCAAATCGATCCCCA |           | 60        |
| Query 37196  |        | CGGCCTATGCCACGATCAAGGGATTCTGAAGTCATGCGAGCC                  |           | 37236     |
| Sbjct 61     |        | CGGCCTATGCCACGATCAAGGGATTCTGAAGTCATGCGAGCC                  |           | 101       |

Fig. S5. BLAST with *tnpA* gene sequence (Gene ID: 15152808)

16S rRNA gene:

ATTACCGCGGCTGCTGGCACGAAGTTAGCCGGTGTCTTATTCTTTGGGTACCGTCAGA  
ACAACCGGGTATTAGCCGGCTGCTTTTCTTTCCCAACAAAAGGGCTTTACAACCCGA  
AGGCCTTCTTACCCACGCGGTATGGCTGGATCAGGCTTGCGCCCATTTGCCAATAT  
TCCCCACTGCTGCCTCCCGTAGG

[Download](#) [GenBank](#) [Graphics](#) [Next](#) [Previous](#) [Descriptions](#)

**Stenotrophomonas koreensis strain TR6-01 16S ribosomal RNA, partial sequence**

Sequence ID: [NR\\_041019.1](#) Length: **1463** Number of Matches: **1**

Range 1: 313 to 506 [GenBank](#) [Graphics](#) [Next Match](#) [Previous Match](#)

| Score         | Expect | Identities                                                    | Gaps      | Strand     |
|---------------|--------|---------------------------------------------------------------|-----------|------------|
| 359 bits(194) | 3e-99  | 194/194(100%)                                                 | 0/194(0%) | Plus/Minus |
| Query 1       |        | ATTACCGCGGCTGCTGGCACGAAGTTAGCCGGTGTCTTATTCTTTGGGTACCGTCAGAACA |           | 60         |
| Sbjct 506     |        | ATTACCGCGGCTGCTGGCACGAAGTTAGCCGGTGTCTTATTCTTTGGGTACCGTCAGAACA |           | 447        |
| Query 61      |        | ACCGGGTATTAGCCGGCTGCTTTTCTTTCCCAACAAAAGGGCTTTACAACCCGAAGGCCT  |           | 120        |
| Sbjct 446     |        | ACCGGGTATTAGCCGGCTGCTTTTCTTTCCCAACAAAAGGGCTTTACAACCCGAAGGCCT  |           | 387        |
| Query 121     |        | TCTTACCCACGCGGTATGGCTGGATCAGGCTTGCGCCCATTTGCCAATATTTCCCACTG   |           | 180        |
| Sbjct 386     |        | TCTTACCCACGCGGTATGGCTGGATCAGGCTTGCGCCCATTTGCCAATATTTCCCACTG   |           | 327        |
| Query 181     |        | CTGCCTCCCGTAGG                                                |           | 194        |
| Sbjct 326     |        | CTGCCTCCCGTAGG                                                |           | 313        |

Fig. S6. BLAST with 16S rRNA gene sequence (NCBI Reference Sequence: NR\_041019.1)
